# Supplementary material
Source: MDPI journal article supplement (https://www.mdpi.com/2073-4441/14/10/1584)

**Table S1.** Summary of hydrogeologic parameters for hydrogeological units 1 and 2 described in Table 1.

| SOURCE                      | Upper Aquitard                                |                                          | Upper Aquifer                            |                                          |                                                                                       |
|-----------------------------|-----------------------------------------------|------------------------------------------|------------------------------------------|------------------------------------------|---------------------------------------------------------------------------------------|
|                             | K' (m/s)                                      | Ss (m <sup>-1</sup> )                    | K (m/s)                                  | T (m <sup>2</sup> /s)                    | Ss (m <sup>-1</sup> )                                                                 |
| Zeevaert (1953)             | $1.3 \times 10^{-10}$                         | $2.7 \times 10^{-3}$                     |                                          |                                          |                                                                                       |
| Marsal and Mazari (1959)    | $1 \times 10^{-9}$ to $1 \times 10^{-8}$      | $1 \times 10^{-2}$ to $1 \times 10^{-6}$ |                                          |                                          |                                                                                       |
| Mesri et al. (1975)         | $1 \times 10^{-10}$                           | $2.9 \times 10^{-3}$                     |                                          |                                          |                                                                                       |
| Herrera et al. (1974)       | $5.3 \times 10^{-9}$ to $1.6 \times 10^{-10}$ |                                          | $9 \times 10^{-5}$                       | $7.3 \times 10^{-4}$                     | $0.9 \times 10^{-4}$                                                                  |
| Juarez-Badillo (1975, 1983) | $3.3 \times 10^{-10}$                         | $1.96 \times 10^{-3}$                    |                                          |                                          |                                                                                       |
| Tlalli Lab. (1983)          | $3.8 \times 10^{-10}$                         | $4.3 \times 10^{-3}$                     |                                          |                                          |                                                                                       |
| Cruickshank (1982)          | $2.0 \times 10^{-8}$                          |                                          |                                          | $5 \times 10^{-3}$ to 0.4                |                                                                                       |
| Ortega and Farvolden (1989) | $1.0 \times 10^{-8}$                          |                                          | $1 \times 10^{-2}$ to $1 \times 10^{-6}$ |                                          |                                                                                       |
| Herrera et al. (1989)       | $5.0 \times 10^{-9}$ to $2.0 \times 10^{-8}$  |                                          |                                          | $3 \times 10^{-3}$ to $4 \times 10^{-2}$ | $2 \times 10^{-6}$ to $1 \times 10^{-5}$                                              |
| Rudolph et al. (1989)       | $6.0 \times 10^{-9}$                          |                                          |                                          |                                          | $5.3 \times 10^{-3}$                                                                  |
| Lesser y Asoc (1985)        |                                               |                                          |                                          | $1 \times 10^{-3}$ to 0.1                |                                                                                       |
| Rivera (1990)               | $1.5 \times 10^{-8}$                          |                                          |                                          | $1 \times 10^{-3}$ to $1 \times 10^{-2}$ | $1 \times 10^{-4}$ to $1 \times 10^{-3}$ confined part,<br>0.1 to 0.2 unconfined part |

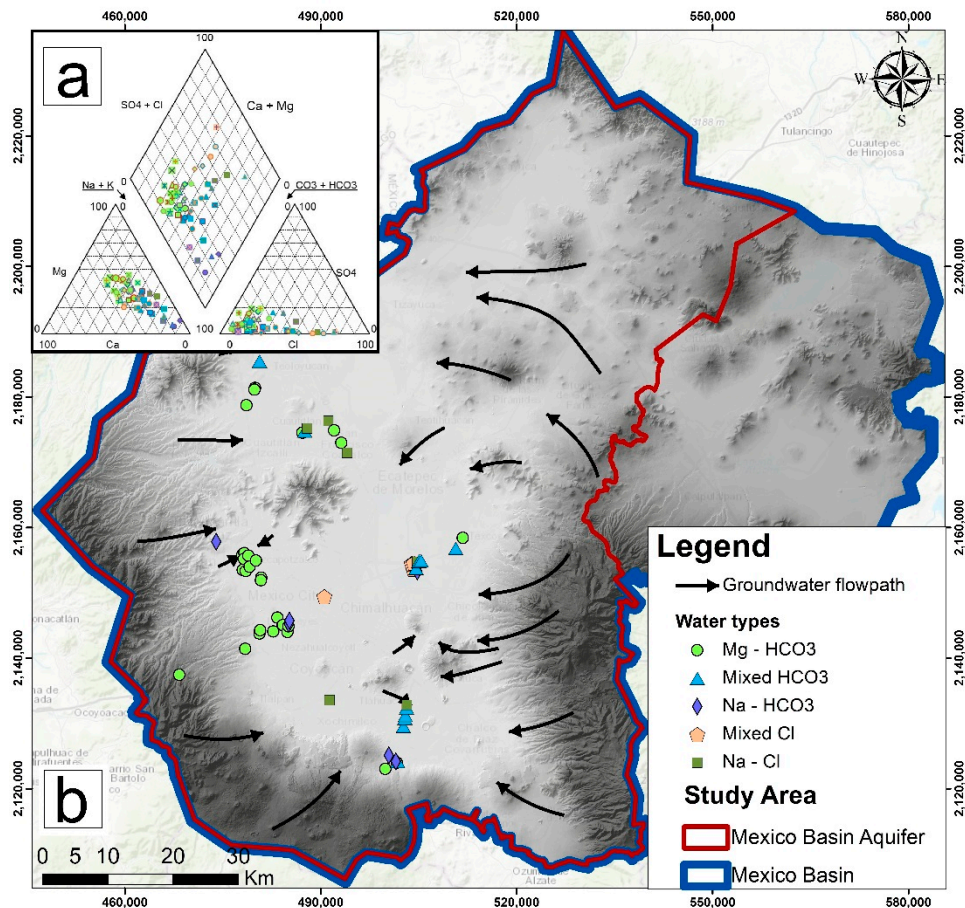

**Figure S1.** (a) Piper diagram showing the five water types identified in the MBA; (b) Spatial distribution of groundwater types.

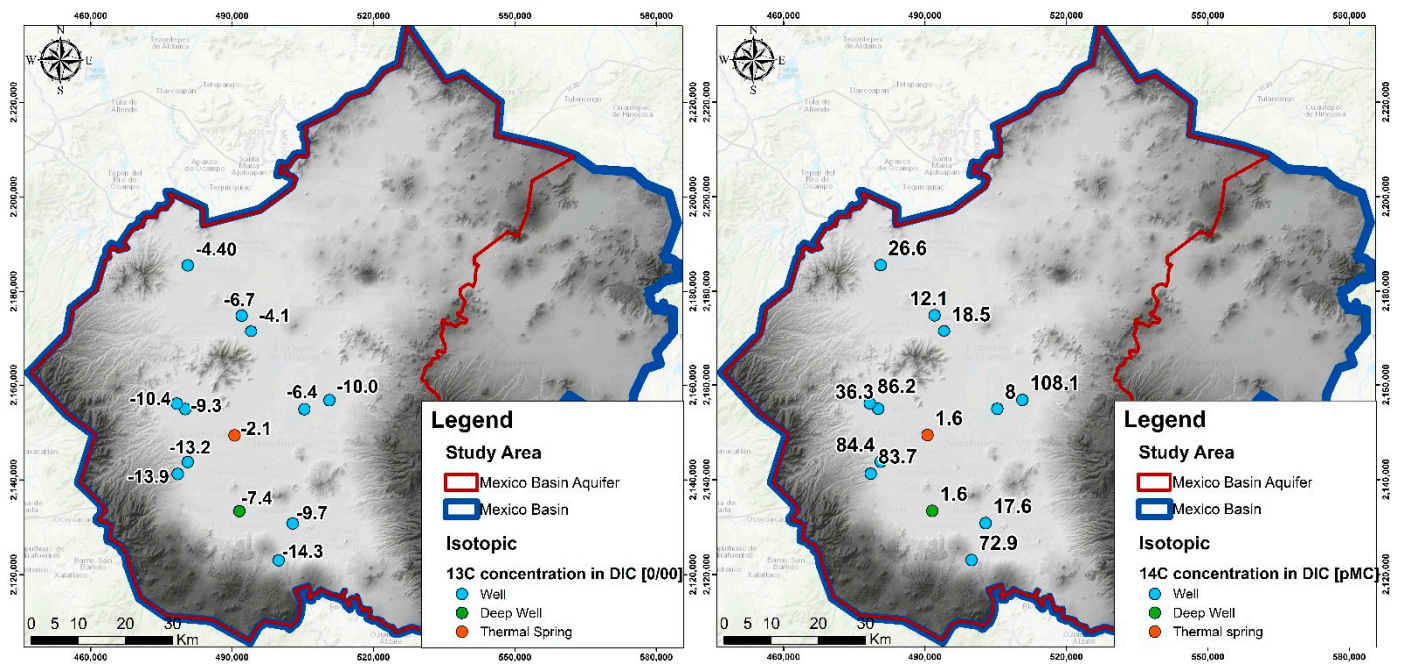

Supplement: s1 [file s1]
